# Supplementary material for: Completing the Genome Sequence of Chlamydia pecorum Strains MC/MarsBar and DBDeUG: New Insights into This Enigmatic Koala (Phascolarctos cinereus) Pathogen
Source: MDPI journal article supplement (doi:10.3390/pathogens10121543), 2021-11-25
Supplement: s1 [file s1]

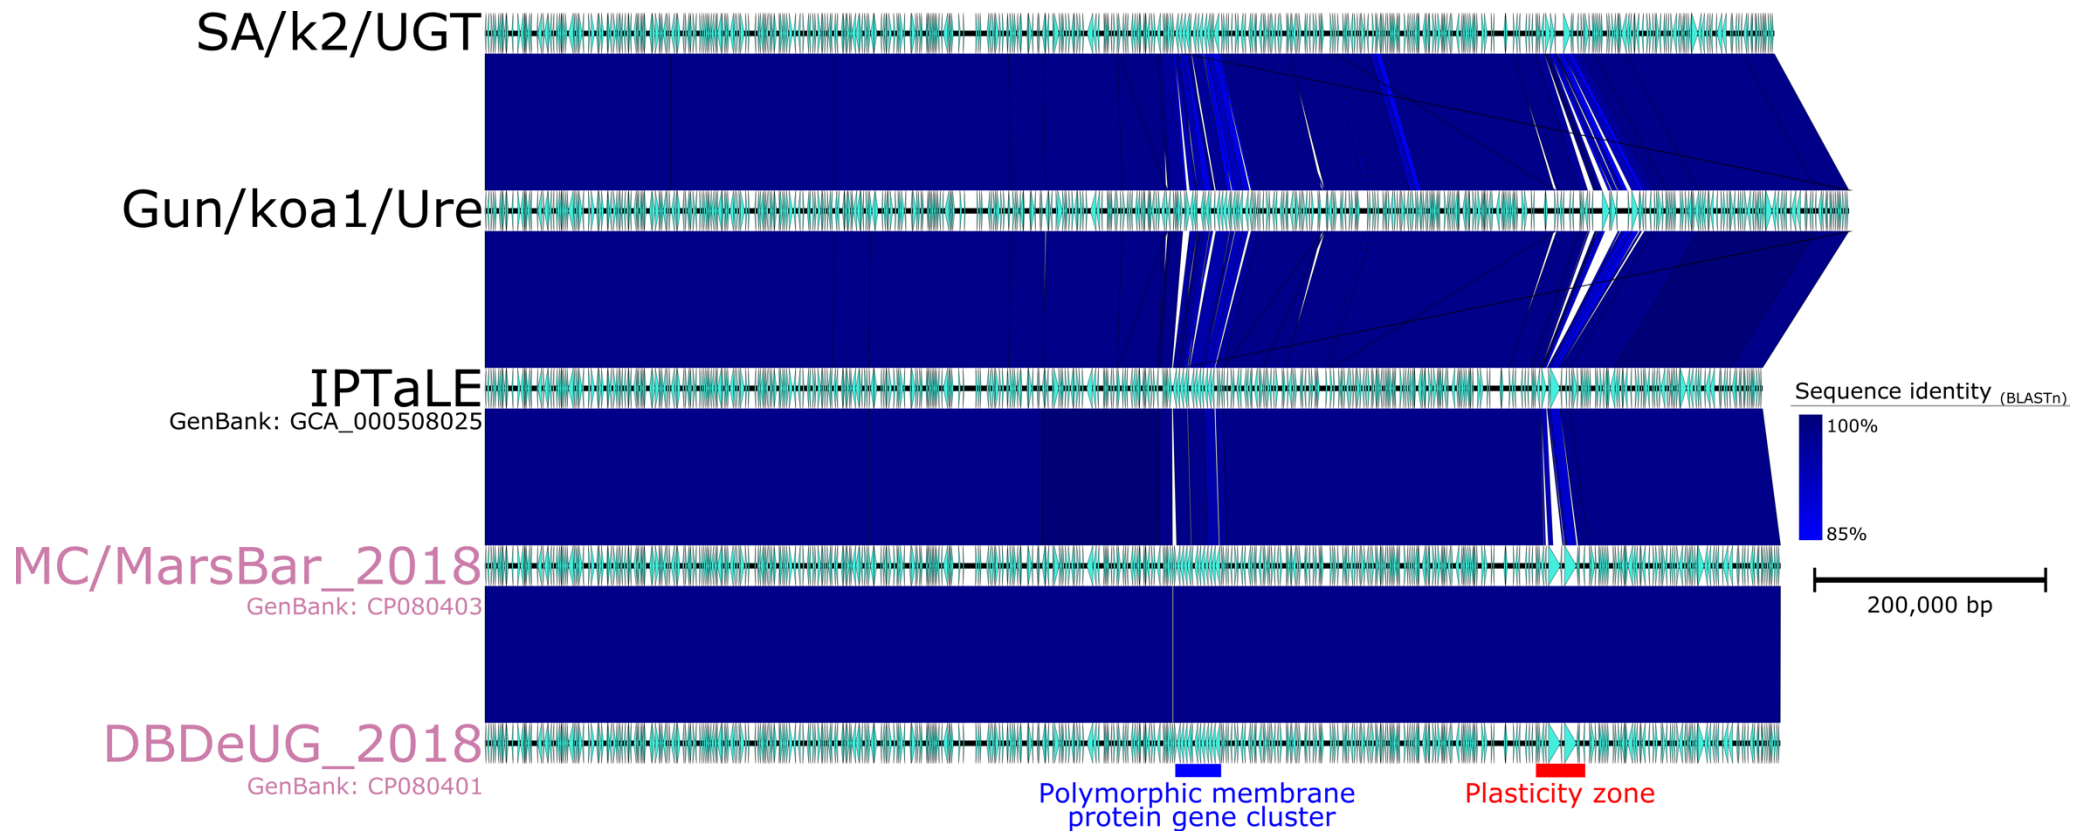

**Figure S3. Whole-genome nucleotide pair-wise comparisons of *Chlamydia pecorum* from koalas.** Blue shading indicates nucleotide identity between sequences according to BLASTn (85 to 100%). Plasticity zone (red) and major polymorphic membrane protein gene cluster (blue) are labelled. Strains Gun/koa1/Ure, IPTaLE, and SA/k2/UGT are represented as draft genomes. Image created using Easyfig v2.2.2.
